# Supplementary material
Source: PubMed Central journal article supplement (PMC6925342)
Supplement: NIHMS1532422-supplement-1.pdf [file NIHMS1532422-supplement-1.pdf]

**Table 1: Frequency of total and new word counts in 120 serial ophthalmology electronic health record encounter reports by 8 providers.**

| <b>Report Section</b>                           | <b>Reports with Section</b> | <b>Total Words (Mean ± SD)</b> | <b>% New Words (Mean ± SD)</b> |
|-------------------------------------------------|-----------------------------|--------------------------------|--------------------------------|
| <b>Subjective</b>                               | <b>120</b>                  | <b>312 ± 174</b>               | <b>24.4 ± 16.7%</b>            |
| Chief complaint /<br>History of present illness | 120                         | 68 ± 31                        | 61.4 ± 22.1%                   |
| Past medical history                            | 86                          | 73 ± 73                        | 4.4 ± 16.2%                    |
| Past ocular history                             | 59                          | 34 ± 35                        | 13.0 ± 27.2%                   |
| Social history                                  | 64                          | 42 ± 20                        | 2.8 ± 13.8%                    |
| Review of systems                               | 83                          | 32 ± 13                        | 10.4 ± 27.3%                   |
| Duplicate review of systems                     | 22                          | 31 ± 6                         | 31.7 ± 38.3%                   |
| Medications                                     | 120                         | 123 ± 86                       | 10.0 ± 14.7%                   |
| <b>Objective</b>                                | <b>120</b>                  | <b>350 ± 132</b>               | <b>22.7 ± 15.1%</b>            |
| Exam                                            | 120                         | 205 ± 39                       | 17.2 ± 11.8%                   |
| Duplicate exam                                  | 88                          | 145 ± 50                       | 21.9 ± 20.0%                   |
| Imaging                                         | 74                          | 64 ± 82                        | 55.5 ± 34.7%                   |
| <b>Assessment</b>                               | <b>120</b>                  | <b>117 ± 85</b>                | <b>27.4 ± 22.0 %</b>           |
| <b>Plan</b>                                     | <b>120</b>                  | <b>46 ± 29</b>                 | <b>44.6 ± 27.2%</b>            |
| <b>Other</b>                                    | <b>120</b>                  | <b>304 ± 128</b>               | <b>25.9 ± 14.0%</b>            |
| Procedure note                                  | 17                          | 200 ± 10                       | 22.0 ± 37.2%                   |
| Attestation                                     | 120                         | 60 ± 29                        | 17.4 ± 22.6%                   |
| Attribution                                     | 120                         | 90 ± 23                        | 34.8 ± 13.3%                   |
| Miscellaneous                                   | 120                         | 63 ± 25                        | 15.8 ± 18.9%                   |
| <b>SOAP Sections</b>                            | <b>120</b>                  | <b>825 ± 264</b>               | <b>23.9 ± 11.0%</b>            |
| <b>Entire Report</b>                            | <b>120</b>                  | <b>1129 ± 288</b>              | <b>24.6 ± 10.5%</b>            |
